# Supplementary material
Source: publisher site journal article supplement (https://www.e-cmh.org/upload/media/cmh-2022-0327-Supplementary-Table-1.pdf)
Supplement: Supplementary file 1 [file cmh-2022-0327-Supplementary-Table-1.pdf]

**Supplementary Table 1.** List of Real-Time primer sequences used in this study

| Target     | Source | Genbank ID     | Sequences                                                        |
|------------|--------|----------------|------------------------------------------------------------------|
| GAPDH      | Human  | NM_002046.7    | F:5'- GAGTCAACGGATTTGGTCGT-3'<br>R:5'- GACAAGCTTCCCGTTCTCAG-3'   |
| α-SMA      | Human  | NM_001613.4    | F:5'-CTGTTCCAGCCATCCTTCAT-3'<br>R:5'-TCATGATGCTTGTAGGTGGT-3'     |
| Collagen I | Human  | NM_000088.4    | F:5'-ATGTTACAGCTTTGTGGACCTC-3'<br>R:5'-CTGTACGCAGGTGATTGGTG-3'   |
| Cyclin D1  | Human  | NM_053056.3    | F:5'-GCTGCGAAGTGGAACCATC-3'<br>R:5'-CCTCCTTCTGCACACATTTGAA-3'    |
| CTGF       | Human  | NM_001901.4    | F:5'-GCCAGACCCAATATGATTAG-3'<br>R:5'-TTGATAGGCTTGGAGATTTGGG-3'   |
| FOXM1      | Human  | NM_021953.4    | F:5'-CGAAAGATGAGTTCTGATGGAC-3'<br>R:5'-TCCTCTCAGTGCTGTGATG-3'    |
| S1PR1      | Human  | NM_001400.5    | F:5'- TCCTCGCCATCGCCATTG-3'<br>R:5'- GAGAGCAGAAGCAGAGTGAAG-3'    |
| S1PR2      | Human  | NM_004230.4    | F:5'-GGCCTAGCCAGTTCTGAAAGC-3'<br>R:5'-GCGTTTCCAGCGTCTCCTT-3'     |
| S1PR3      | Human  | NM_005226.4    | F:5'- CTACGCACGCATCTACTTCC-3'<br>R:5'- CACGCTCACCACAATCACC-3'    |
| FXR        | Human  | NM_001206979.2 | F:5'-ACAGAACAAGTGGCAGGTC-3'<br>R:5'-CTGAAGAAACCTTTACACCCCTC-3'   |
| TGR5       | Human  | NM_170699.3    | F:5'-CTGGCCCTGGCAAGCCTCAT-3'<br>R:5'-CTGCCATGCGCTCCCGT-3'        |
| GAPDH      | Mouse  | NM_008084.3    | F:5'-AGGTCGGTGTGAACGGATTTG-3'<br>R:5'-TGTAGACCATGTAGTTGAGGTCA-3' |
| α-SMA      | Mouse  | NM_007392.3    | F:5'- GCTGGTGATGATGCTCCCA-3'<br>R:5'- GCCATTCCAACCATTACTCC-3'    |
| Collagen I | Mouse  | NM_007742.4    | F:5'- CCAAGAAGACATCCCTGAAGTCA-3'<br>R:5'- TGCACGTCATCGCACACA-3'  |
| Cyclin D1  | Mouse  | NM_007631.3    | F:5'- GAGAAGTTGTGCATCTACAC-3'<br>R:5'-GAAGGGCTTCAACTGTTCC-3'     |
| CTGF       | Mouse  | NM_010217.2    | F:5'-GTGTGTGACGAGCCCAAGGA-3'<br>R:5'- AGTTGGGTCTGGCCAAATGT-3'    |
| FOXM1      | Mouse  | NM_008021.4    | F:5'-ATAGGTGGATTGAGGACCACT-3'<br>R:5'-TCCAATGTCAAGTAGCGGTTG-3'   |
| S1PR1      | Mouse  | NM_007901.5    | F:5'-ATGGTGTCCACTAGCATCCC-3'<br>R:5'-CGATGTTCAACTGCCTGTGTAG-3'   |
| S1PR2      | Mouse  | NM_010333.4    | F:5'-ATGGGCGGCTTATACTCAGAG-3'<br>R:5'-GCGCAGCACAAGATGATGAT-3'    |
| S1PR3      | Mouse  | NM_010101.4    | F:5'-ACTCTCCGGGAACATTACGAT-3'<br>R:5'-CAAGACGATGAAGCTACAGGTG-3'  |
| TIMP-1     | Mouse  | NM_011593.2    | F:5'- CATGGAAAGCCTCTGTGGATAG-3'                                  |

**Supplementary Table 1.** Continued

| Target       | Source | Genbank ID  | Sequences                       |
|--------------|--------|-------------|---------------------------------|
| TGF- $\beta$ | Mouse  | NM_011577.2 | R:5'- AAGCTGCAGGCATTGATGTG-3'   |
|              |        |             | F:5'- TGACGTCCTGGAGTTGTACGG-3'  |
| CYP2B10      | Mouse  | NM_009999.4 | R:5'- GGTTTCATGTCATGGATGGTGC-3' |
|              |        |             | F:5'- CAATGGGGAACGTTGGAAGA-3'   |
| FXR          | Mouse  | NM_009108.2 | R:5'- TGATGCACTGGAAGAGGAAC-3'   |
| NTCP         | Mouse  | NM-003049.4 | F:5'- GCTTGATGTGCTACAAAAGCTG-3' |
|              |        |             | R:5'-CGTGGTGATGGTTGAATGTCC-3'   |
|              |        |             | F:5'- GCATGATGCCACTCCTTATAC-3'  |
|              |        |             | R:5'- TACATAGTGTGGCCTTTGGACT-3' |
